# Supplementary material for: Identification of a novel HOOK3-FGFR1 fusion gene involved in activation of the NF-kappaB pathway
Source: PubMed Central journal article supplement (PMC8793161; doi:10.1186/s12935-022-02451-y), 2022-01-26

A

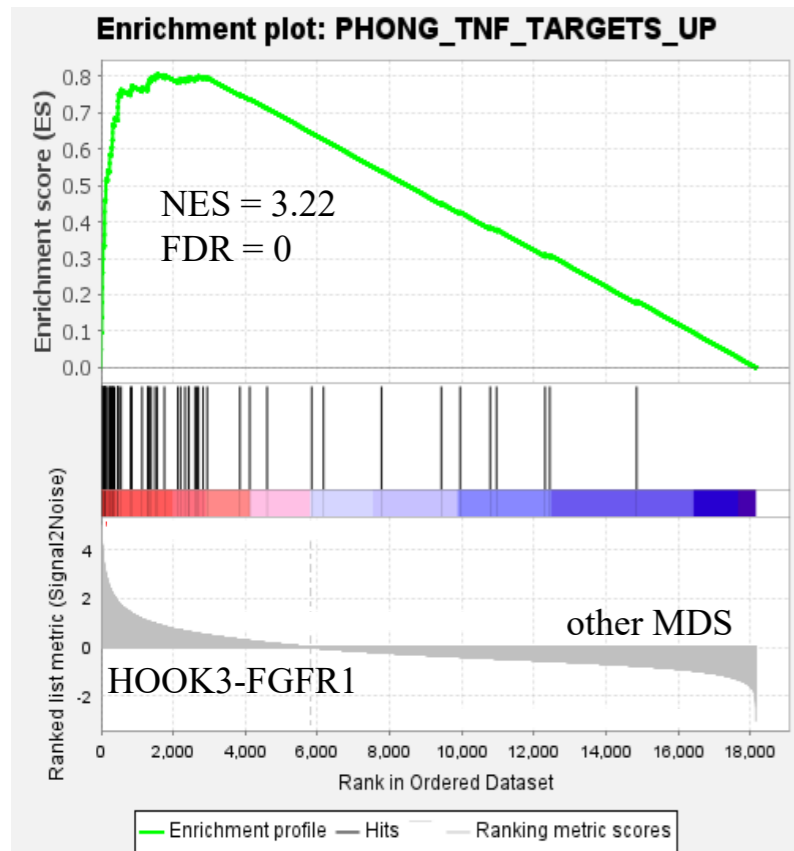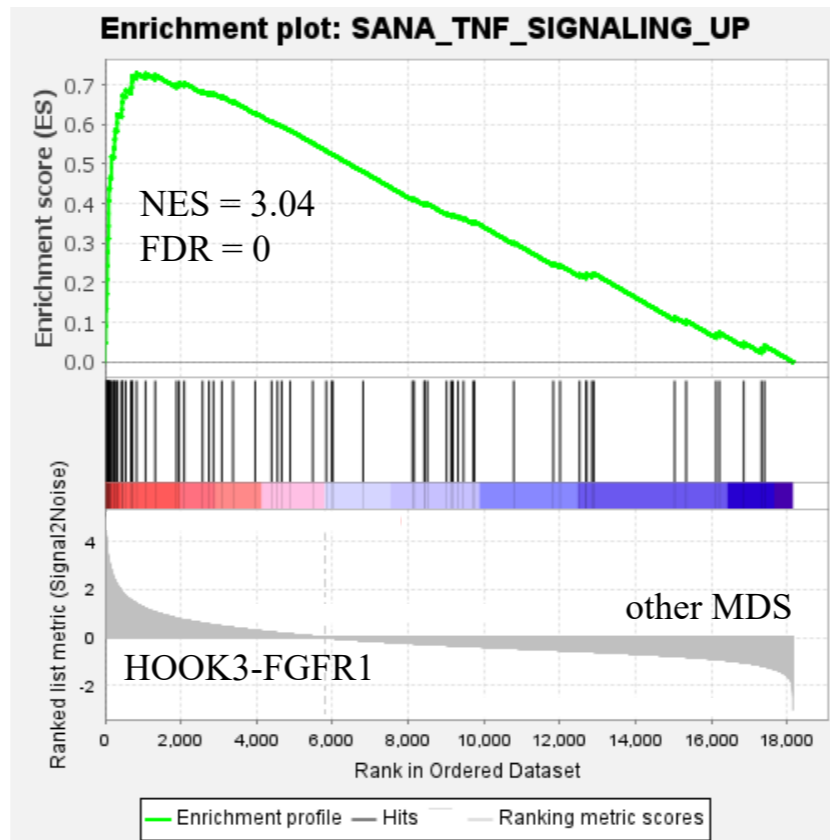

B

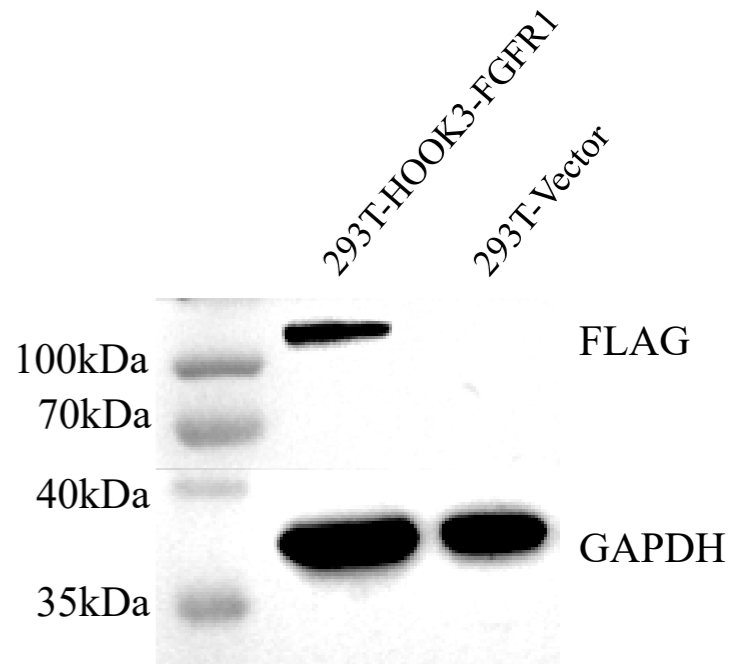

Supplement: 12935_2022_2451_MOESM2_ESM.pdf [file 12935_2022_2451_MOESM2_ESM.pdf]
